# Supplementary material
Source: PubMed Central journal article supplement (PMC7218745)
Supplement: bm9b01745_si_001.pdf [file bm9b01745_si_001.pdf]

Supplementary Information

# Three-Dimensional Printed Cell Culture Model Based on Spherical Colloidal Lignin Particles and Cellulose Nanofibril-alginate Hydrogel

*Xue Zhang<sup>1</sup>, Maria Morits<sup>1</sup>, Christopher Jonkergouw<sup>1</sup>, Ari Ora<sup>2</sup>, Juan José Valle-Delgado<sup>1</sup>,  
Muhammad Farooq<sup>1</sup>, Rubina Ajdary<sup>1</sup>, Siqi Huan<sup>1</sup>, Markus Linder<sup>1</sup>, Orlando Rojas<sup>1</sup>, Mika  
Henrikki Sipponen<sup>1,3</sup>, Monika Österberg<sup>1\*</sup>.*

## AUTHOR ADDRESS

<sup>1</sup>Department of Bioproducts and Biosystems, School of Chemical Engineering, Aalto University, FI-00076 Aalto, Finland

<sup>2</sup>Department of Applied Physics, School of Science, Aalto University, FIN-02150 Espoo, Finland

<sup>3</sup>Current address: Department of Materials and Environmental Chemistry, Stockholm University, SE-106 91 Stockholm

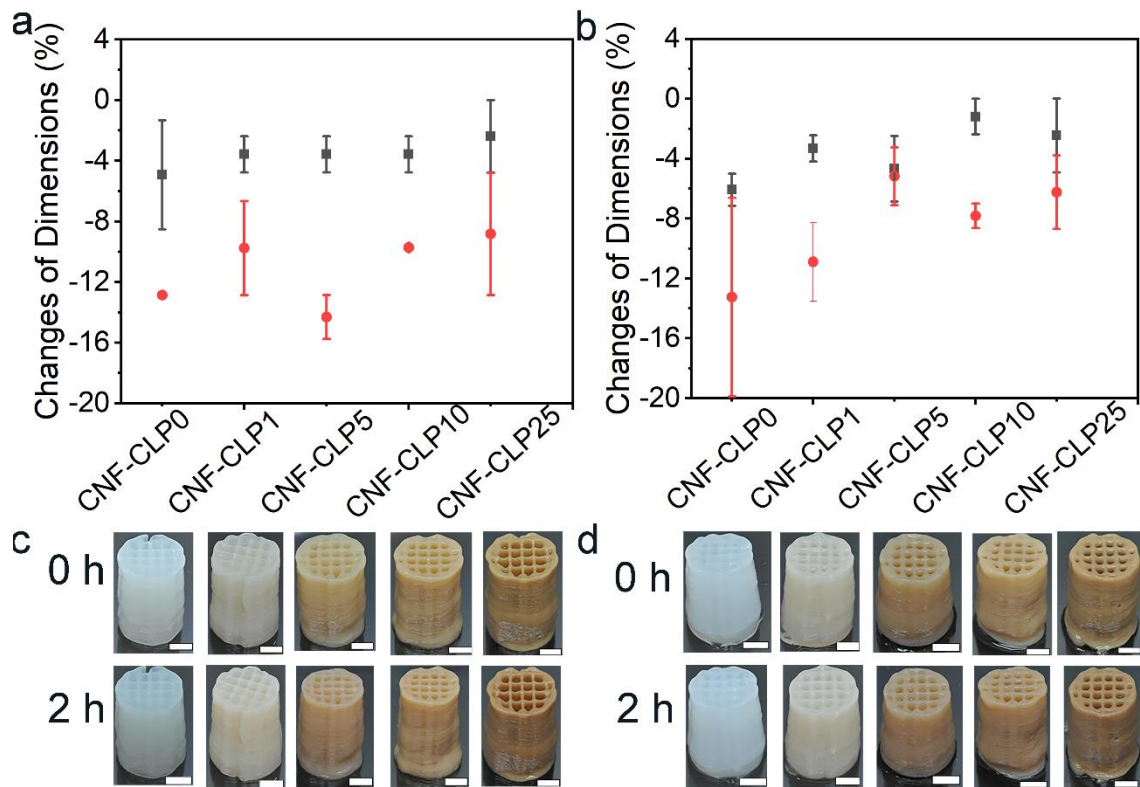

**Figure S1.** Dimensional change ratio in height (■ black) and cross section (● red) of printed scaffolds were measured in different conditions (a) Scaffolds were stored at ambient conditions for 2 hours without crosslinking. (b) Scaffolds were cross-linked, dimensions were measured immediately after crosslinking and after 2 hours of storage at ambient conditions. The dimensional changes were calculated with 2 scaffolds. The corresponding photos of the printed scaffolds after (c) 0 h and 2 h standing at ambient conditions (d) 0 h – immediately after crosslinking and after 2 h of standing at ambient conditions. The scale bars in all the photos are 0.5 cm. All the scaffolds were printed into cylinder shape with a diameter of 1.5 cm and height of 2 cm.

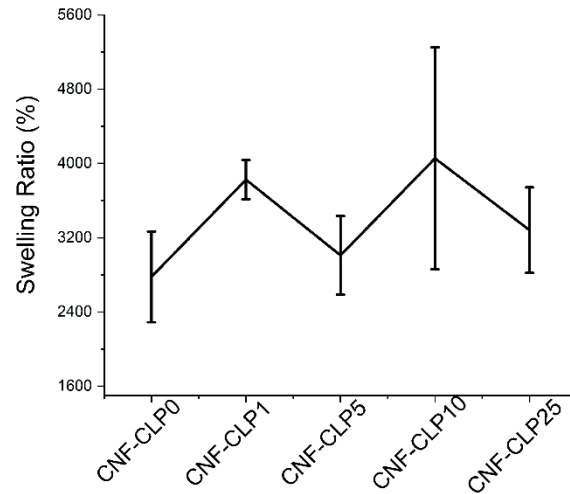

**Figure S2.** Swelling ratio behavior of freeze-dried scaffolds of different formulations calculated by dividing the weight of rewetted scaffolds with the weight of dry scaffolds.

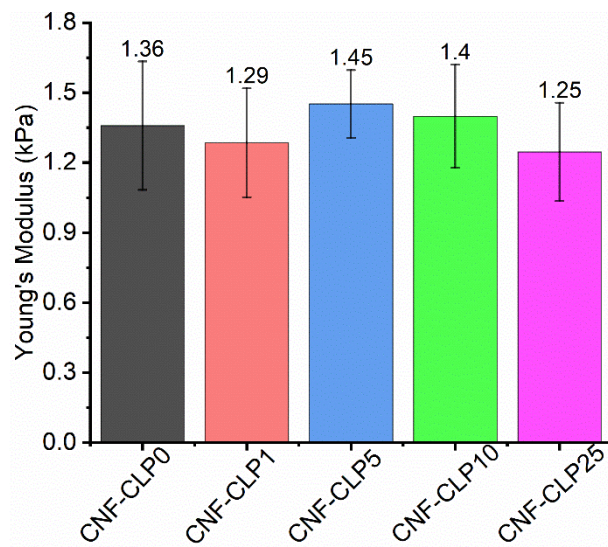

**Figure S3.** Compressive Young's modulus of printed solid constructs of 100% infill of different formulations after storage in DPBS+ for 48 h. Mean values from six samples were calculated and plotted for each formulation.
